# Supplementary material for: MiR-199a-5p and let-7c cooperatively inhibit migration and invasion by targeting MAP4K3 in hepatocellular carcinoma
Source: PubMed Central journal article supplement (PMC5355128; doi:10.18632/oncotarget.14623), 2017-01-13
Supplement: oncotarget-08-13666-s001.pdf [file oncotarget-08-13666-s001.pdf]

## MiR-199a-5p and let-7c cooperatively inhibit migration and invasion by targeting MAP4K3 in hepatocellular carcinoma

### Supplementary Materials

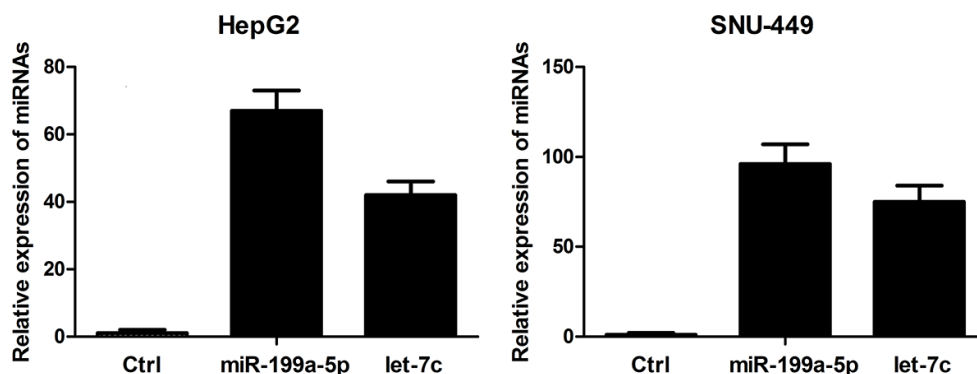

**Supplementary Figure 1: Expression of miR-199a-5p and let-7c in HCC cells after transfection.** HepG2 and SNU-449 HCC cells were transfected with the miR-199a-5p or let-7c agomir at a final concentration of 50 nM. Expression of miR-199a-5p and let-7c was determined using quantitative real-time PCR 48 h post-transfection.

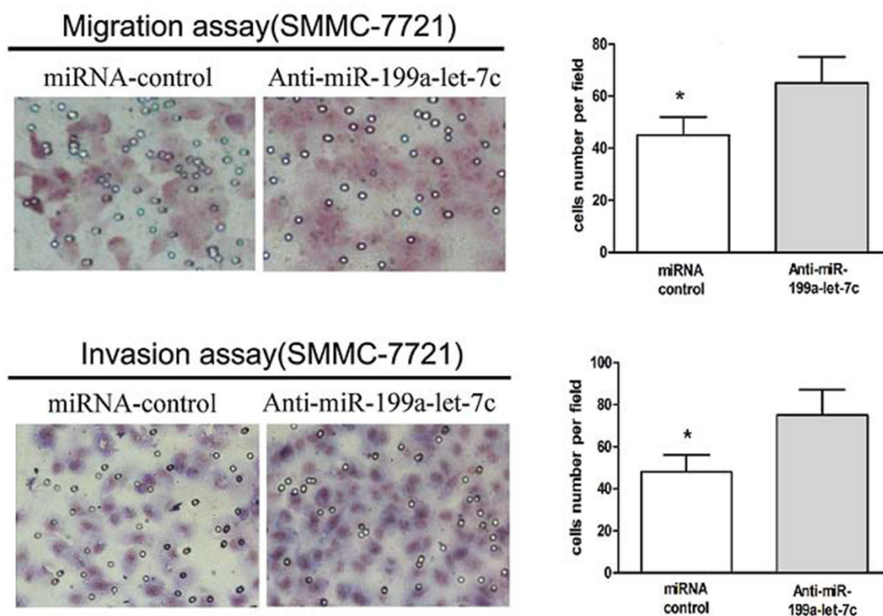

**Supplementary Figure 2: MiR-199a-5p and let-7c cooperatively inhibit HCC cell migration and invasion.** SMMC-7721 cells were transfected with miR-199a-5p and let-7c inhibitors or negative control at a final concentration of 50 nM. The migration and invasion of SMMC-7721 were detected by transwell assays. Representative images are shown on the left. The values shown are expressed as the mean  $\pm$  SEM; asterisks indicate significance.

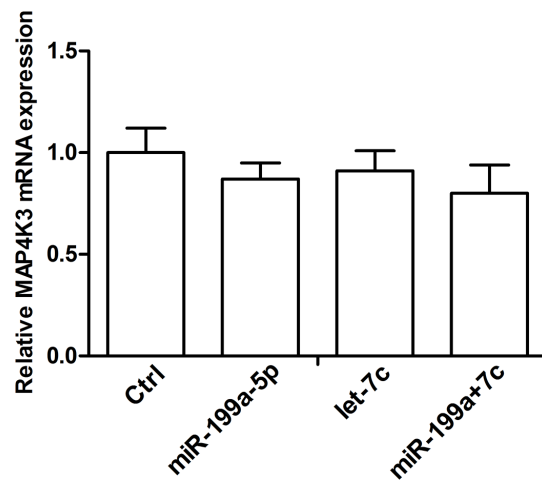

**Supplementary Figure 3: Real-time PCR assay of MAP4K3 mRNA expression in HepG2 cells transfected with the miR-199a-5p, let-7c, miR-199a-5p or let-7c agomirs or negative control.**

**Supplementary Table 1: Forty-one candidate genes were predicted to be the possible targets of miR-199a-5p by the three algorithms**

| Target gene   | Gene description                                                                                  |
|---------------|---------------------------------------------------------------------------------------------------|
| APPBP2        | amyloid beta precursor protein binding protein 2                                                  |
| ARHGAP12      | Rho GTPase activating protein 12                                                                  |
| ARHGAP21      | Rho GTPase activating protein 21                                                                  |
| ATXN7         | ataxin 7                                                                                          |
| CCNL1         | cyclin L1                                                                                         |
| CELSR1        | cadherin, EGF LAG seven-pass G-type receptor 1                                                    |
| EPB41L1       | erythrocyte membrane protein band 4.1-like 1                                                      |
| EPHA7         | EPH receptor A7                                                                                   |
| FLRT3         | fibronectin leucine rich transmembrane protein 3                                                  |
| FZD4          | frizzled class receptor 4                                                                         |
| GRB10         | growth factor receptor-bound protein 10                                                           |
| HIF1A         | hypoxia inducible factor 1, alpha subunit                                                         |
| HLF           | hepatic leukemia factor                                                                           |
| HSPA5         | heat shock 70kDa protein 5 (glucose-regulated protein)                                            |
| JUNB          | jun B proto-oncogene                                                                              |
| KIAA0355      | KIAA0355                                                                                          |
| KL            | klotho                                                                                            |
| KPNA4         | karyopherin alpha 4 (importin alpha 3)                                                            |
| LAMC1         | laminin, gamma 1 (formerly LAMB2)                                                                 |
| LIN7C         | lin-7 homolog C (C. elegans)                                                                      |
| MAB21L1       | mab-21-like 1 (C. elegans)                                                                        |
| MAP3K11       | mitogen-activated protein kinase kinase kinase 11                                                 |
| <b>MAP4K3</b> | mitogen-activated protein kinase kinase kinase kinase 3                                           |
| MPP5          | membrane protein, palmitoylated 5                                                                 |
| MYH9          | myosin, heavy chain 9, non-muscle                                                                 |
| NLK           | nemo-like kinase                                                                                  |
| NPAS2         | neuronal PAS domain protein 2                                                                     |
| PAN3          | PAN3 poly(A) specific ribonuclease subunit                                                        |
| PLXND1        | plexin D1                                                                                         |
| PPARGC1A      | peroxisome proliferator-activated receptor gamma, coactivator 1 alpha                             |
| PPP1R2        | protein phosphatase 1, regulatory (inhibitor) subunit 2                                           |
| RAD23B        | RAD23 homolog B (S. cerevisiae)                                                                   |
| RANBP2        | RAN binding protein 2                                                                             |
| RNF38         | ring finger protein 38                                                                            |
| RORB          | RAR-related orphan receptor B                                                                     |
| SACS          | sacsin molecular chaperone                                                                        |
| SLC24A3       | solute carrier family 24                                                                          |
| SMARCD1       | SWI/SNF related, matrix associated, actin dependent regulator of chromatin, subfamily d, member 1 |
| STK4          | serine/threonine kinase 4                                                                         |
| TAB3          | TGF-beta activated kinase 1/MAP3K7 binding protein 3                                              |
| WDTC1         | WD and tetratricopeptide repeats 1                                                                |

**Supplementary Table 2: Primer sequences for qPCR and miRNA agomir sequences**

| No. | Name                  | Sequence                                             |
|-----|-----------------------|------------------------------------------------------|
| 1   | MAP4K3<br>(qPCR)      | Forward 5'- GCAAAGCCATCCCAAGTT -3'                   |
|     |                       | Reverse 5'- GTGCCTCTATGTTCAATTCTGTT-3'               |
| 2   | GAPDH<br>(qPCR)       | Forward 5'- GCTGAGAACGGGAAGCTTGT -3'                 |
|     |                       | Reverse 5'- GCCAGGGGTGCTAAGCAG -3'                   |
| 3   | mir-199a-let-7c       | Forward 5'-GAGGATCCCCGGGTACCGGTTGGTGGTTTCCTTGGCTG-3' |
|     |                       | Reverse 5'-CACACATTCCACAGGCTAGGATACTCATGACACATTAC-3' |
| 4   | miR-199a-5p agomir    | 5'-CCCAGUGUUCAGACUACCUGUUC-3'                        |
| 5   | miR-199a-5p inhibitor | 5'-CACCGUUUGUAGCAACUUGUGG-3'                         |
| 6   | let-7c agomir         | 5'-UGAGGUAGUAGGGUUGUAUGGUU-3'                        |
| 7   | let-7c inhibitor      | 5'-AACCAUACAACCUACUACCUCA-3'                         |
| 8   | negative control      | 5'-CAGUACUUUUGUGUAGUACAA-3'                          |

**mir-199a-let-7c:** miR-199a-5p and let-7c recombinant plasmid construct.
